# Supplementary material for: Functional Assessment of Genetic Variants with Outcomes Adapted to Clinical Decision-Making
Source: PubMed Central journal article supplement (PMC4894565; doi:10.1371/journal.pgen.1006096), 2016-06-06
Supplement: pgen.1006096.s007.pdf [file pgen.1006096.s007.pdf]

### A Colony Size assay

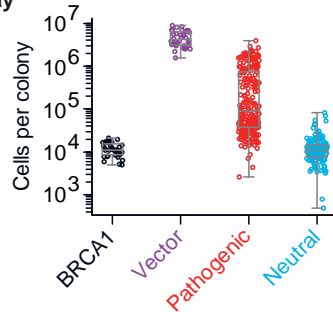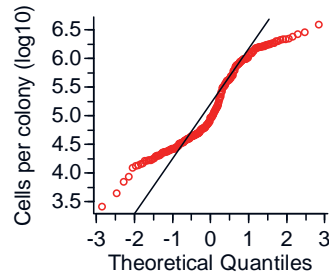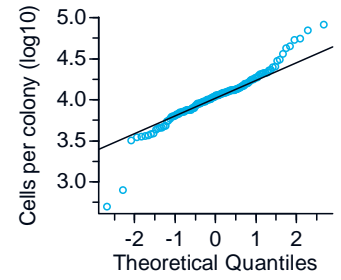

### B Liquid Medium assay

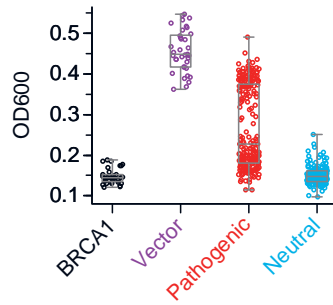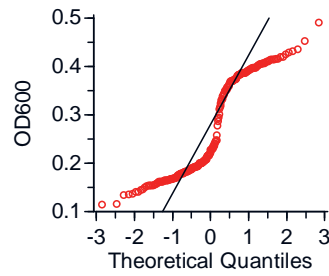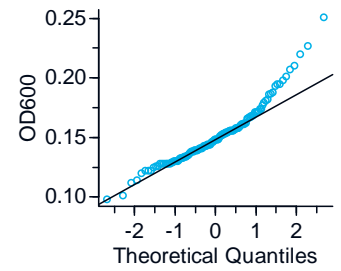

### C Spot Formation assay

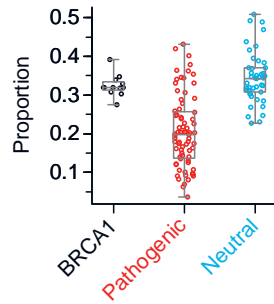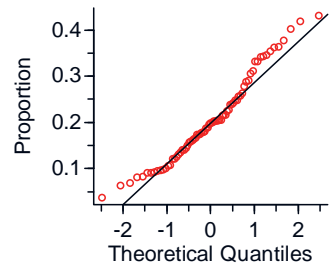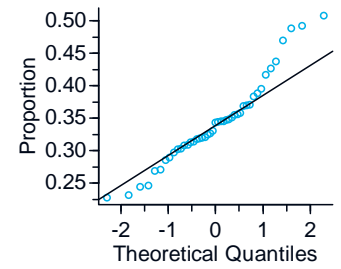

### D Yeast Localization assay

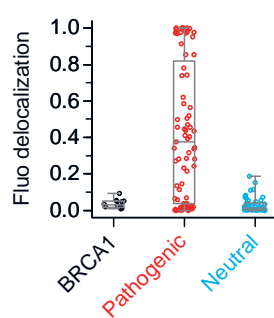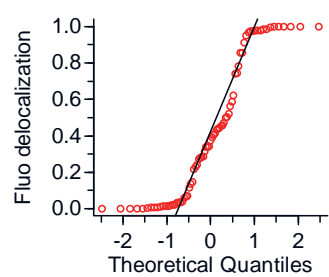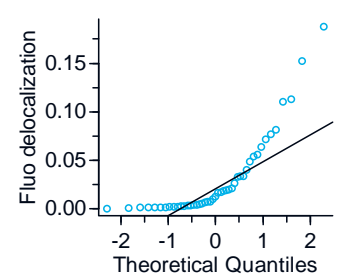

### S5 Fig. Distribution of the pathogenic and neutral values

(A) Colony Size assay. The left panel exhibits dotplot distributions. Boxplots provide distribution parameters: box central bar, median; box, interquartile range (50% of the distribution); whiskers, extreme values. The middle panel shows the normal Quantile-Quantile (QQ) plot of the pathogenic values. Dots forming a straight line suggest that the values are normally distributed. Black line, straight line through the quantiles 25% and 75%. The right panel shows the normal QQ plot of the neutral values.

(B) Liquid Medium assay.

(C) Spot Formation assay.

(D) Yeast Localization assay.
