# Supplementary material for: Functional Assessment of Genetic Variants with Outcomes Adapted to Clinical Decision-Making
Source: PubMed Central journal article supplement (PMC4894565; doi:10.1371/journal.pgen.1006096), 2016-06-06
Supplement: pgen.1006096.s010.pdf [file pgen.1006096.s010.pdf]

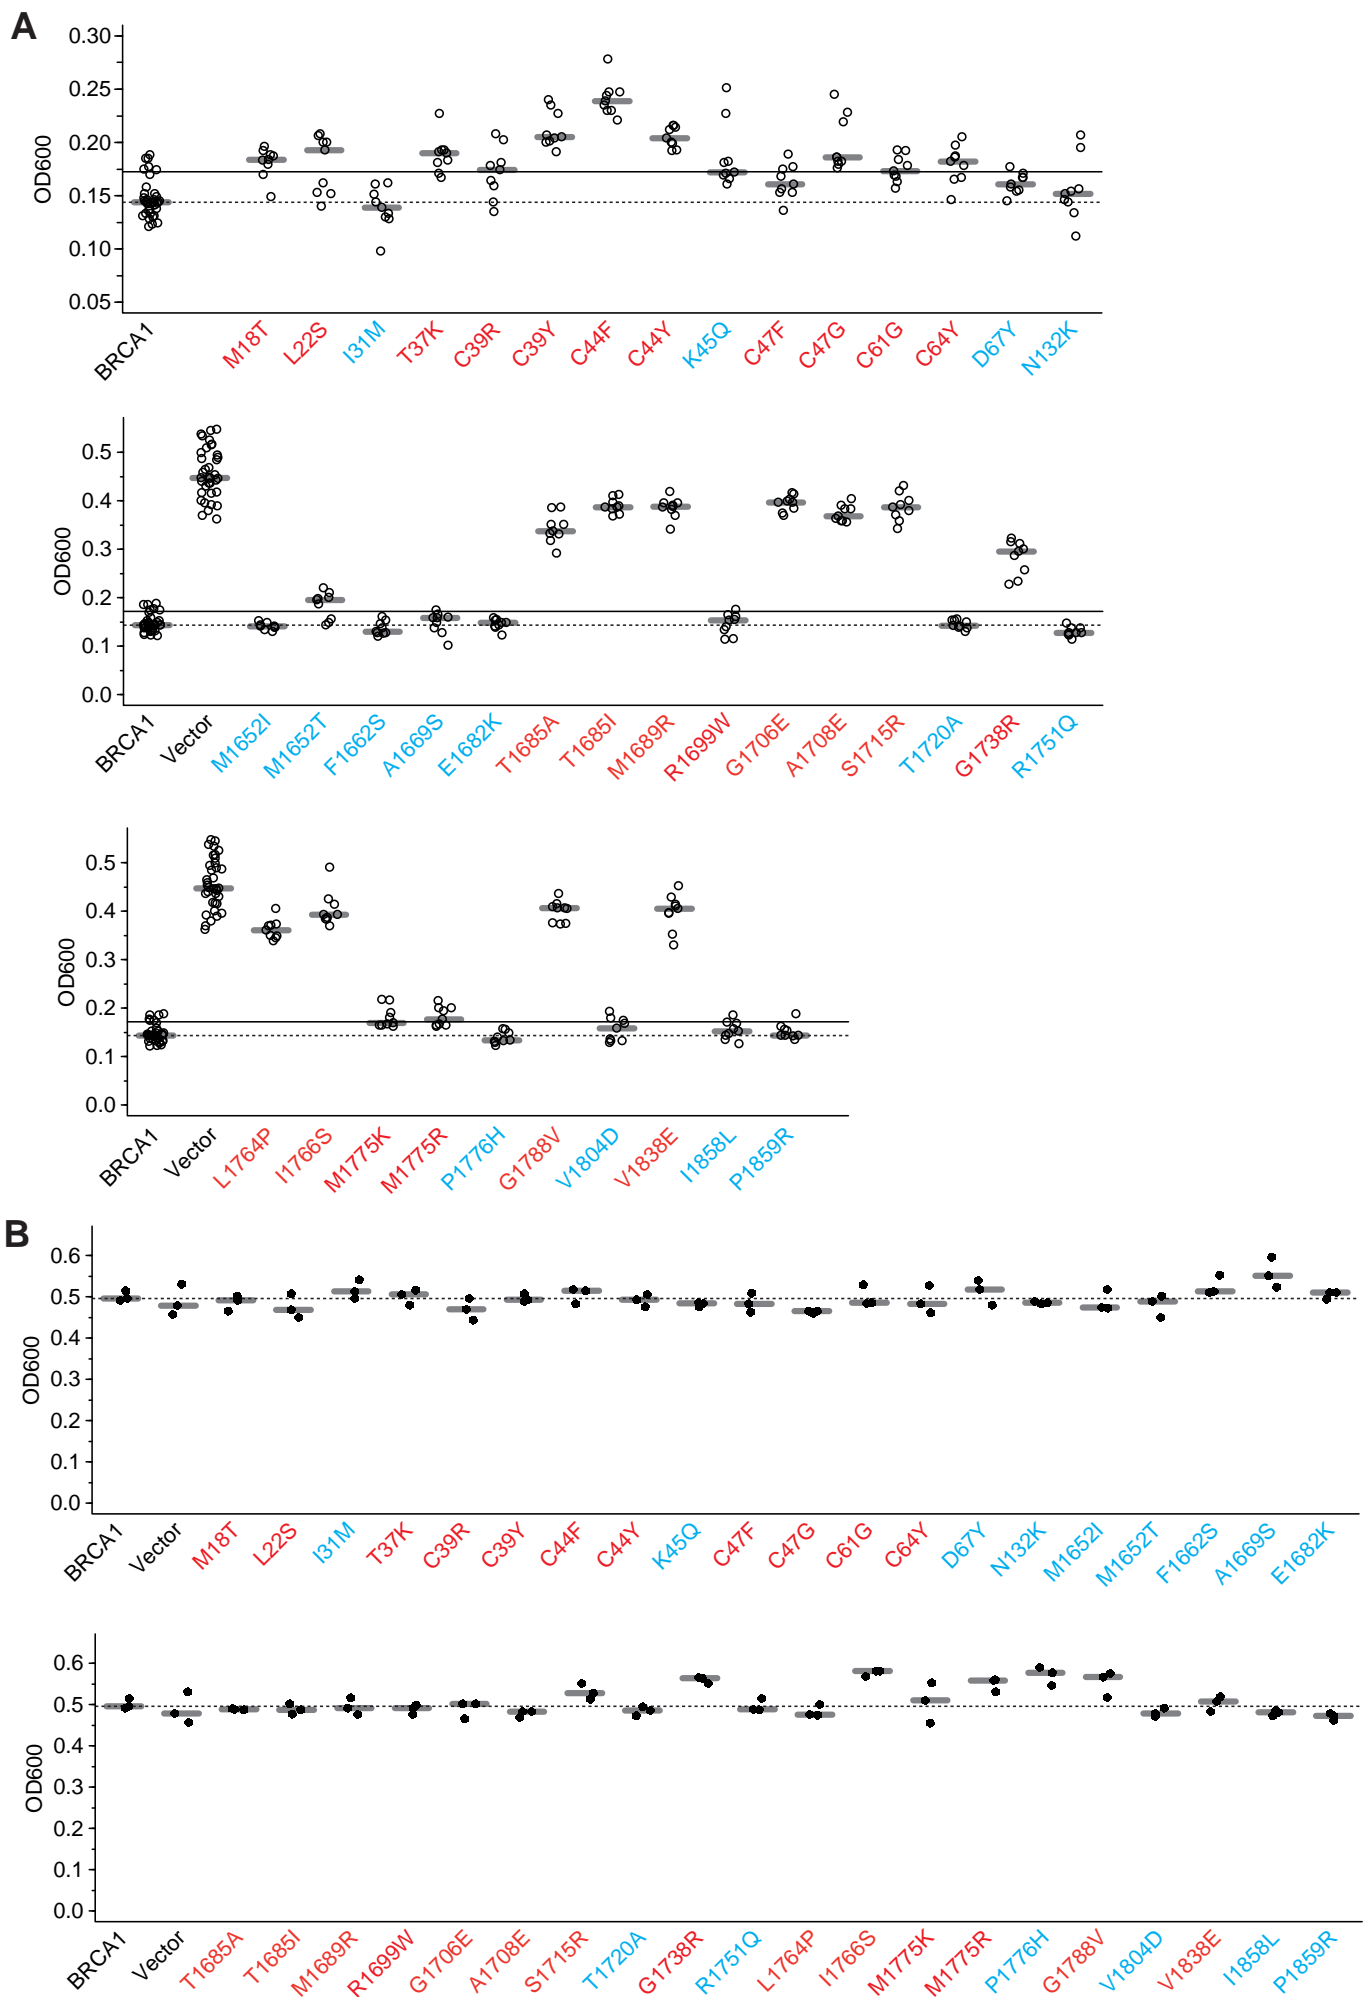

**S8 Fig. Supplemental information in the Liquid Medium assay**

(A-B) Same as for the Colony Size assay (S3 Fig). One OD unit corresponds to  $10^8$  cells / ml.
