# Supplementary material for: Functional Assessment of Genetic Variants with Outcomes Adapted to Clinical Decision-Making
Source: PubMed Central journal article supplement (PMC4894565; doi:10.1371/journal.pgen.1006096), 2016-06-06

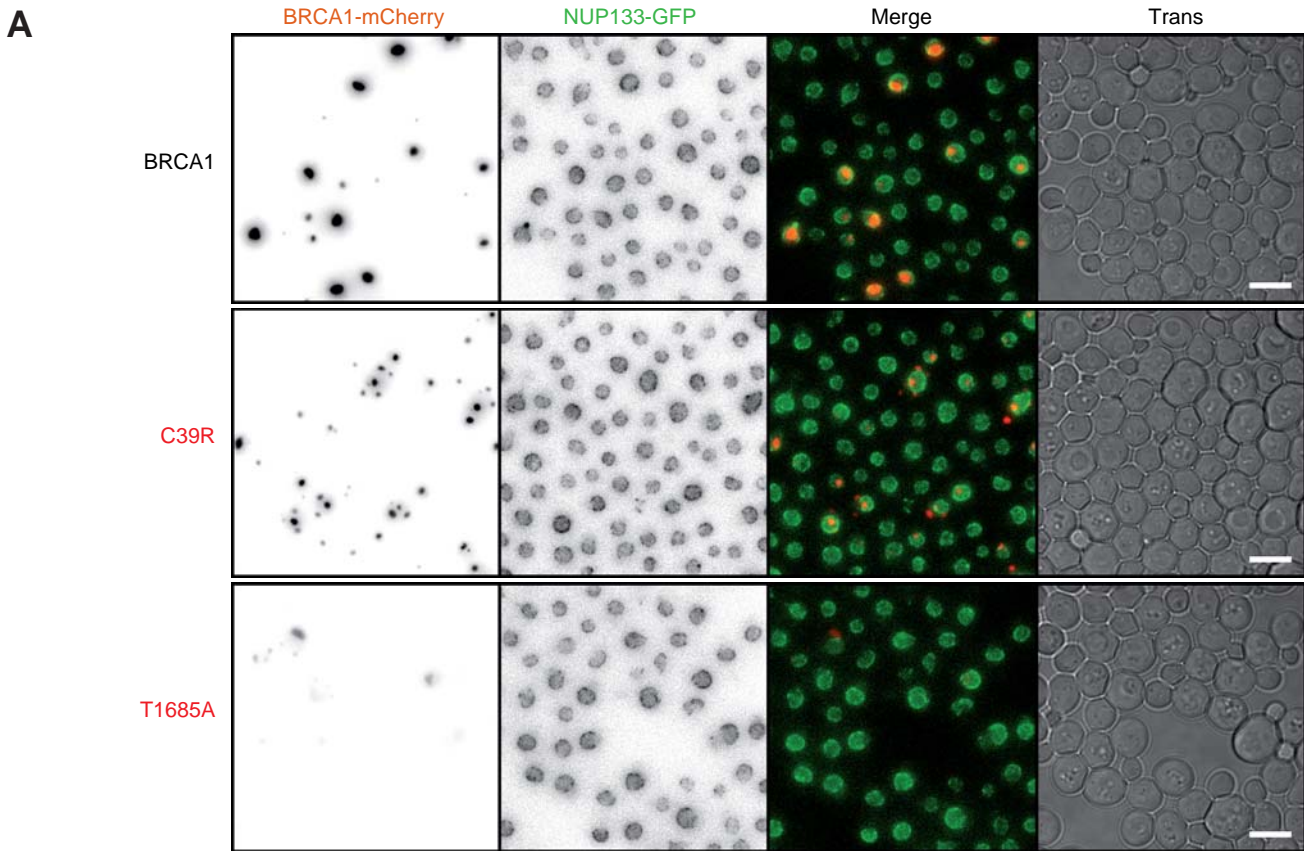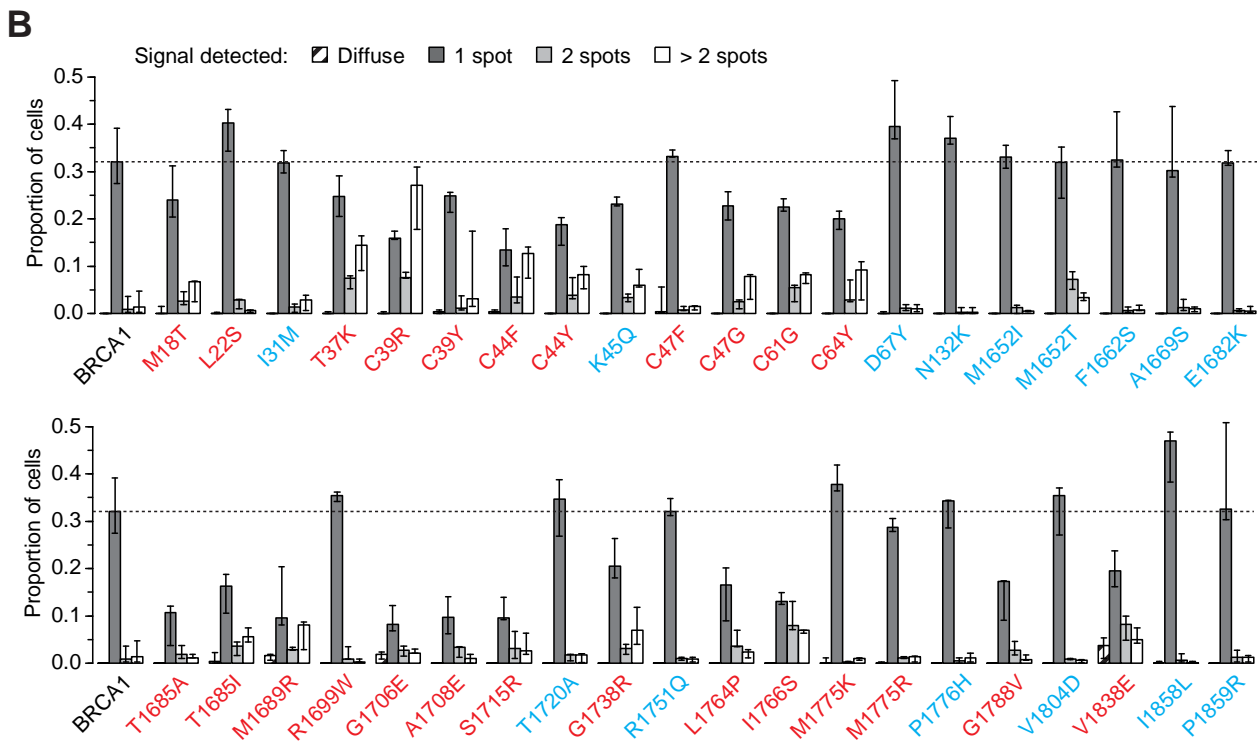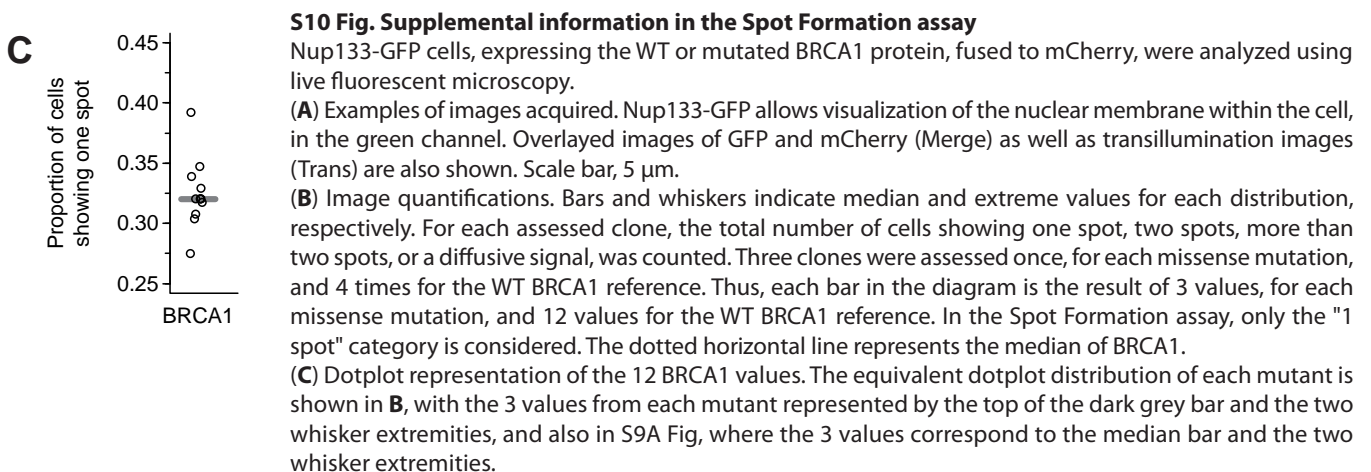

Supplement: pgen.1006096.s012.pdf [file pgen.1006096.s012.pdf]
