# Supplementary material for: Functional Assessment of Genetic Variants with Outcomes Adapted to Clinical Decision-Making
Source: PubMed Central journal article supplement (PMC4894565; doi:10.1371/journal.pgen.1006096), 2016-06-06
Supplement: pgen.1006096.s014.pdf [file pgen.1006096.s014.pdf]

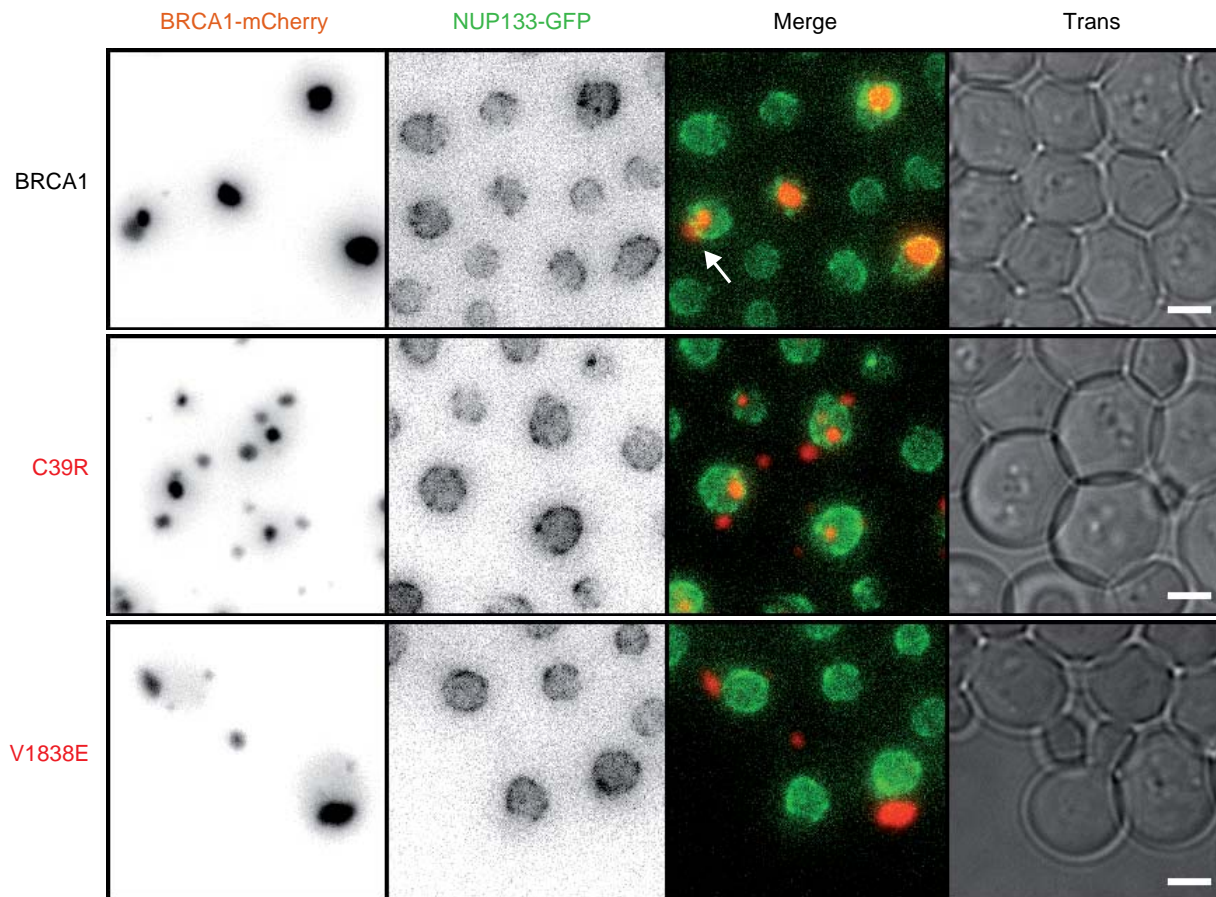

**S12 Fig. Supplemental information in the Yeast Localization assay**

Fluorescent images acquired in the Yeast Localization assay, as in S10A Fig. The arrow points to rare cytoplasmic spot in cells expressing the WT BRCA1-mCherry protein. Scale bar, 2  $\mu$ m.
